# Supplementary material for: Unsupported nanoporous gold catalyst for highly selective hydroamination of alkynes
Source: Royal Society of Chemistry journal article supplement (doi:10.1039/d2ra07120g), 2023-01-01

## Supporting Information

### Unsupported Nanoporous Gold Catalyst for Highly Selective Hydroamination of Alkynes

Ye Lu,<sup>\*a</sup> Ying Wang,<sup>a</sup> He Li,<sup>a</sup> Peihe Li,<sup>a</sup> Xiujuan Feng,<sup>b</sup> Yoshinori Yamamoto,<sup>b,c,d</sup> Ming Bao<sup>\*b</sup>  
and Jinghai Liu<sup>\*a</sup>

<sup>a</sup>Inner Mongolia Key Laboratory of Carbon Nanomaterials, College of Chemistry and Materials Science, Nano  
Innovation Institute, Inner Mongolia Minzu University, Tongliao 028000, China.

<sup>b</sup>State Key Laboratory of Fine Chemicals, Dalian University of Technology, Dalian 116023, China.

<sup>c</sup>Department of Chemistry, Graduate School of Science, Tohoku University, Sendai 980-8577, Japan.

<sup>d</sup>Research Organization of Science and Technology, Ritsumeikan University, Kusatsu, Shiga 525-8577, Japan.

Corresponding Authors

\*E-mail: luye2012@163.com

mingbao@dlut.edu.cn

jhliu2008@sinano.ac.cn

### Table of Contents

|                                                                                                               |      |
|---------------------------------------------------------------------------------------------------------------|------|
| 1. General Information.....                                                                                   | S-2  |
| 2. Preparation of AuNPore Catalyst.....                                                                       | S-2  |
| 3. Characterization of Catalyst .....                                                                         | S-2  |
| 4. Representative Procedure for the AuNPore-Catalyzed One-Pot, Two-Step Synthesis<br>of Secondary Amines..... | S-3  |
| 5. Characterization Data of Products .....                                                                    | S-4  |
| 6. References.....                                                                                            | S-13 |
| 7. Copies of <sup>1</sup> H NMR Spectra of Products.....                                                      | S-15 |

## 1. General Information

$^1\text{H}$  NMR spectra was recorded on a Bruker Ascend 500 M NMR spectrometer;  $\text{CDCl}_3$  was used as a solvent, while tetramethylsilane (TMS) was used as an internal standard. The chemical shifts are reported in the ppm down field ( $\delta$ ) from TMS, and the coupling constants  $J$  are expressed in Hz. The peak patterns are labeled as follows: s, singlet; d, doublet; t, triplet; q, quartet; m, multiplet. Thin-layer chromatography (TLC) was carried out on  $\text{SiO}_2$  (silica gel 60F<sub>254</sub>, Merck), and the spots were located with UV light, iodoplatinate reagent, or 1% aqueous  $\text{KMnO}_4$ . Flash chromatography was carried out on  $\text{SiO}_2$  (silica gel 60, 200–300 mesh).

## 2. Preparation of AuNPore Catalyst

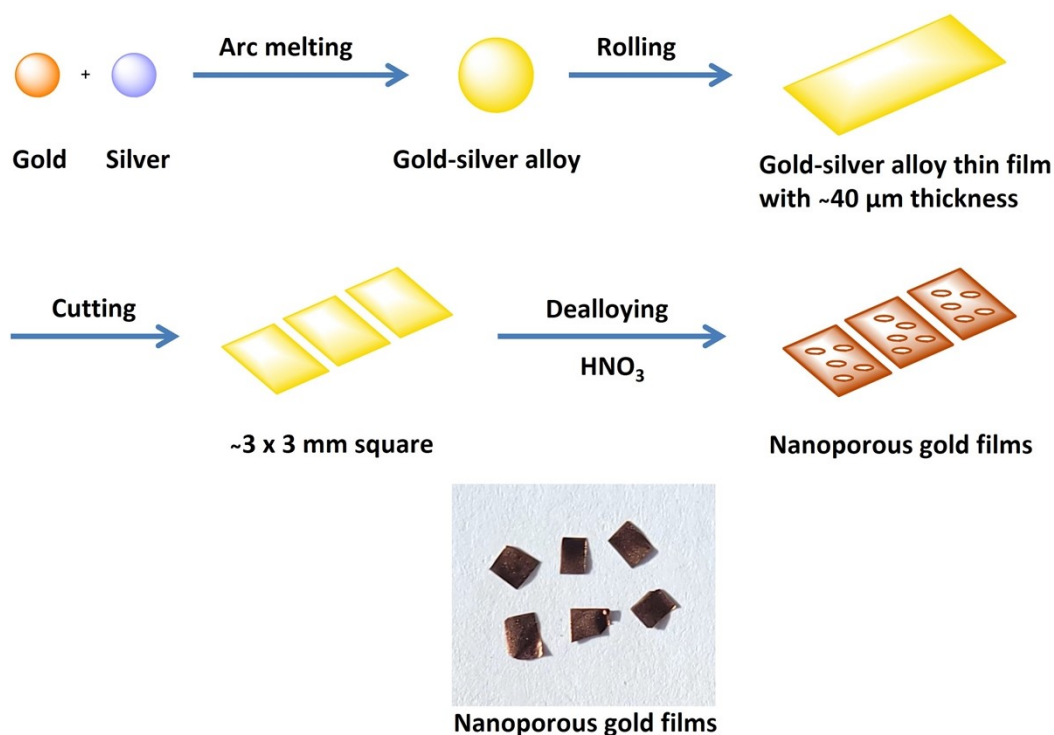

**Figure S1.** Schematic illustration of the fabrication process of nanoporous gold catalyst.

## 3. Characterization of Catalyst

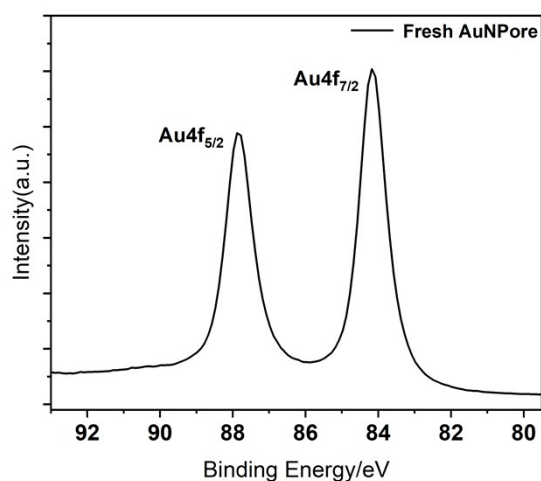

**Figure S2.** XPS spectra of Au 4f of fresh AuNPore.

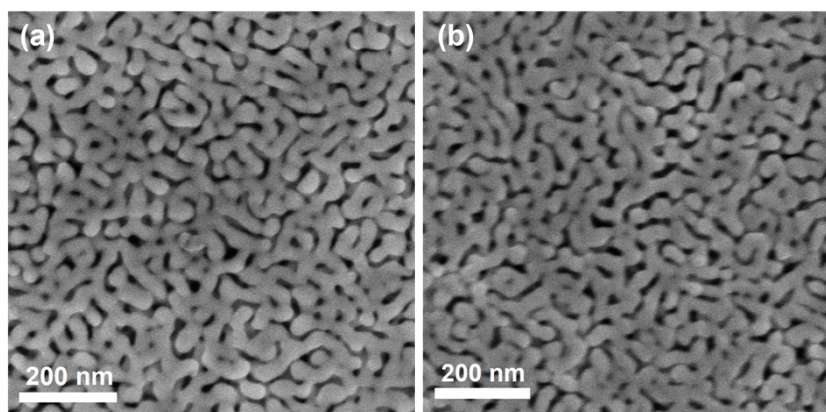

**Figure S3.** SEM images of (a) fresh AuNPore and (b) AuNPore after six runs

#### 4. Representative Procedure for the AuNPore-Catalyzed One-Pot, Two-Step Synthesis of Secondary Amines

AuNPore (4.92 mg, 5 mol %), phenylacetylene (**1a**, 51.07 mg, 0.5 mmol), and phenylamine (**2a**, 55.55 mg, 0.6 mmol) were placed in a V-shaped vial reactor with a magnetic stir bar under N<sub>2</sub> atmosphere. The reaction mixture was stirred at 50 °C for 24 h and cooled down to room temperature. Then, PhMe<sub>2</sub>SiH (102.20 mg, 0.75 mmol) and H<sub>2</sub>O (18 mg, 1.0 mmol) were added directly to reaction mixture and stirring was continued at room temperature for 5 h. The AuNPore was recovered by filtration, followed by washing with acetone, and the residual was purified via silica gel chromatography (eluent: petroleum ether/ethyl acetate = 5/1) to afford secondary

amines (**4a**) as a colorless oil.

## 5. Characterization Data of Products

### *N*,1-Diphenylethan-1-imine (**3a**)

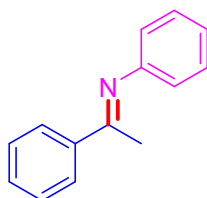

Yellow oil (91.8 mg, 94% yield). <sup>1</sup>H NMR (500 MHz, CDCl<sub>3</sub>): δ 8.02 (dd, *J* = 7.7, 2.0 Hz, 2H), 7.54–7.47 (m, 3H), 7.40 (t, *J* = 7.8 Hz, 2H), 7.13 (t, *J* = 7.4 Hz, 1H), 6.89–6.81 (m, 2H), 2.28 (s, 3H). NMR data are in agreement with those from the literature.<sup>1</sup>

### *N*-Phenyl-1-(*p*-tolyl)ethan-1-imine (**3b**)

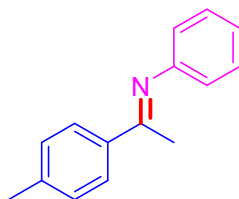

Yellow oil (84.8 mg, 81% yield). <sup>1</sup>H NMR (500 MHz, CDCl<sub>3</sub>): δ 7.87 (d, *J* = 8.2 Hz, 2H), 7.34 (t, *J* = 7.8 Hz, 2H), 7.25 (d, *J* = 8.2 Hz, 2H), 7.08 (t, *J* = 7.4 Hz, 1H), 6.82–6.77 (m, 2H), 2.41 (s, 3H), 2.21 (s, 3H). NMR data are in agreement with those from the literature.<sup>1</sup>

### *N*-Phenyl-1-(*m*-tolyl)ethan-1-imine (**3c**)

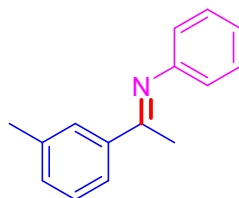

Yellow oil (87.9 mg, 84% yield). <sup>1</sup>H NMR (500 MHz, CDCl<sub>3</sub>): δ 7.82 (s, 1H), 7.72 (d, *J* = 8.0 Hz, 1H), 7.38–7.31 (m, 3H), 7.28 (d, *J* = 7.6 Hz, 1H), 7.12–7.05 (m, 1H), 6.83–6.76 (m, 2H), 2.42 (s, 3H), 2.22 (s, 3H). NMR data are in agreement with those from the literature.<sup>1</sup>

### ***N*-Phenyl-1-(*o*-tolyl)ethan-1-imine (3d)**

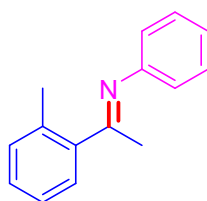

Yellow oil (85.8 mg, 82% yield, E/Z = 2:1). <sup>1</sup>H NMR (500 MHz, CDCl<sub>3</sub>): δ 7.45–7.37 (m, 2H), 7.34–7.26 (m, 2H), 7.20–7.09 (m, 2H), 7.07–7.02 (m, 1H), 6.91–6.86 (m, 1.5H), 6.72–6.68 (m, 0.5H), 2.54 (s, 3H, major), 2.50 (s, 3H, minor), 2.19 (s, 3H, major), 2.14 (s, 3H, minor). NMR data are in agreement with those from the literature.<sup>2</sup>

### **1-(4-Methoxyphenyl)-*N*-phenylethan-1-imine (3e)**

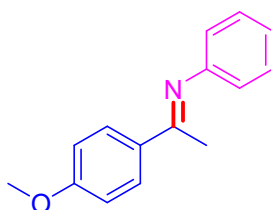

Yellow solid (90.1 mg, 80% yield). <sup>1</sup>H NMR (500 MHz, CDCl<sub>3</sub>): δ 7.94 (d, *J* = 9.0 Hz, 2H), 7.36–7.32 (m, 2H), 7.09–7.05 (m, 1H), 6.96–6.93 (m, 2H), 6.79–6.77 (m, 2H), 3.87 (s, 3H), 2.20 (s, 3H). NMR data are in agreement with those from the literature.<sup>1</sup>

### ***N,N*-Dimethyl-4-(1-(phenylimino)ethyl)aniline (3f)**

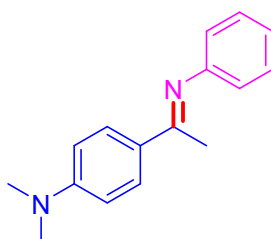

Brown solid (89.4 mg, 75% yield). <sup>1</sup>H NMR (500 MHz, CDCl<sub>3</sub>): δ 7.89 (d, *J* = 9.0 Hz, 2H), 7.32 (t, *J* = 8.0 Hz, 2H), 7.04 (t, *J* = 7.5 Hz, 1H), 6.79 (d, *J* = 7.0 Hz, 2H), 6.71 (d, *J* = 8.5 Hz, 2H), 3.02 (s, 6H), 2.17 (s, 3H). NMR data are in agreement with those from the literature.<sup>1</sup>

### **1-(4-Fluorophenyl)-*N*-phenylethan-1-imine (3g)**

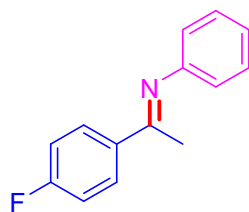

Yellow solid (93.8 mg, 88% yield).  $^1\text{H}$  NMR (500 MHz,  $\text{CDCl}_3$ ):  $\delta$  8.01–7.95 (m, 2H), 7.35 (t,  $J = 7.9$  Hz, 2H), 7.14–7.07 (m, 3H), 6.79 (d,  $J = 7.0$  Hz, 2H), 2.22 (s, 3H). NMR data are in agreement with those from the literature.<sup>1</sup>

### 1-(4-Chlorophenyl)-*N*-phenylethan-1-imine (3h)

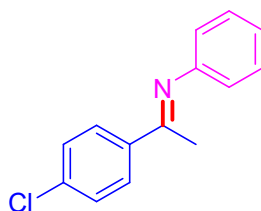

Yellow solid (97.6 mg, 85% yield).  $^1\text{H}$  NMR (500 MHz,  $\text{CDCl}_3$ ):  $\delta$  7.92 (d,  $J = 8.5$  Hz, 2H), 7.42 (d,  $J = 8.5$  Hz, 2H), 7.36 (t,  $J = 7.5$  Hz, 2H), 7.10 (t,  $J = 7.5$  Hz, 1H), 6.79 (d,  $J = 7.5$  Hz, 2H), 2.22 (s, 3H). NMR data are in agreement with those from the literature.<sup>3</sup>

### 1-(4-Bromophenyl)-*N*-phenylethan-1-imine (3i)

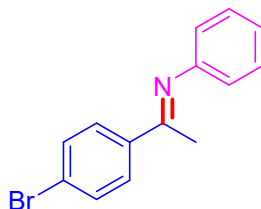

Yellow oil (115.1 mg, 84% yield).  $^1\text{H}$  NMR (500 MHz,  $\text{CDCl}_3$ ):  $\delta$  7.85 (d,  $J = 8.6$  Hz, 2H), 7.58 (d,  $J = 8.6$  Hz, 2H), 7.35 (t,  $J = 7.8$  Hz, 2H), 7.10 (t,  $J = 7.4$  Hz, 1H), 6.78 (d,  $J = 7.0$  Hz, 2H), 2.21 (s, 3H). NMR data are in agreement with those from the literature.<sup>1</sup>

### *N*-Phenyl-1-(4-(trifluoromethyl)phenyl)ethan-1-imine (3j)

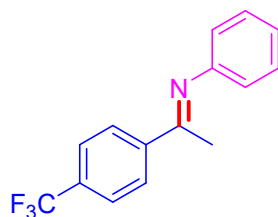

Yellow oil (118.5 mg, 90% yield).  $^1\text{H}$  NMR (500 MHz,  $\text{CDCl}_3$ ):  $\delta$  8.09 (d,  $J = 8.1$  Hz, 2H), 7.71 (d,  $J = 8.2$  Hz, 2H), 7.37 (t,  $J = 7.9$  Hz, 2H), 7.12 (t,  $J = 7.4$  Hz, 1H), 6.84–6.76 (m, 2H), 2.27 (s, 3H). NMR data are in agreement with those from the literature.<sup>1</sup>

### 1-(Naphthalen-2-yl)-*N*-phenylethan-1-imine (3k)

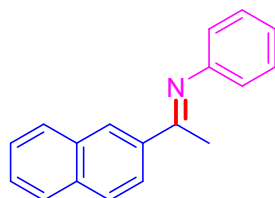

Yellow solid (104.3 mg, 85% yield).  $^1\text{H}$  NMR (500 MHz,  $\text{CDCl}_3$ ):  $\delta$  8.35 (d,  $J = 1.8$  Hz, 1H), 8.22 (dd,  $J = 8.6, 1.8$  Hz, 1H), 7.99–7.83 (m, 3H), 7.60–7.48 (m, 2H), 7.43–7.32 (m, 2H), 7.17–7.04 (m, 1H), 6.90–6.75 (m, 2H), 2.36 (s, 3H). NMR data are in agreement with those from the literature.<sup>3</sup>

### 1-Phenyl-*N*-(*p*-tolyl)ethan-1-imine (3l)

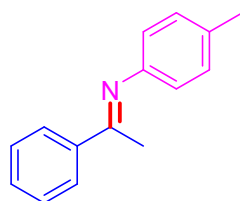

Yellow oil (97.3 mg, 93% yield).  $^1\text{H}$  NMR (500 MHz,  $\text{CDCl}_3$ ):  $\delta$  7.98–7.95 (m, 2H), 7.46–7.43 (m, 3H), 7.16 (d,  $J = 8.0$  Hz, 2H), 6.72–6.69 (m, 2H), 2.35 (s, 3H), 2.24 (s, 3H). NMR data are in agreement with those from the literature.<sup>1</sup>

### 1-Phenyl-*N*-(*m*-tolyl)ethan-1-imine (3m)

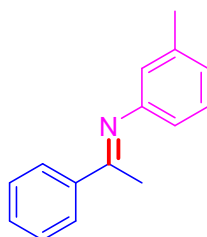

Yellow oil (95.2 mg, 91% yield).  $^1\text{H}$  NMR (500 MHz,  $\text{CDCl}_3$ ):  $\delta$  7.99–7.93 (m, 2H), 7.48–7.42 (m, 3H), 7.24 (dd,  $J = 14.1, 6.4$  Hz, 1H), 6.90 (d,  $J = 7.6$  Hz, 1H), 6.65–6.57 (m, 2H), 2.36 (s, 3H), 2.24 (s, 3H). NMR data are in agreement with those from the literature.<sup>4</sup>

### 1-Phenyl-*N*-(*o*-tolyl)ethan-1-imine (3n)

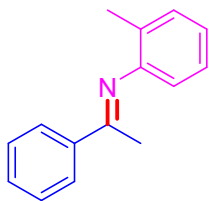

Yellow solid (94.2 mg, 90% yield).  $^1\text{H}$  NMR (500 MHz,  $\text{CDCl}_3$ ):  $\delta$  8.04–7.88 (m, 2H), 7.46 (d,  $J = 7.2$  Hz, 3H), 7.26 (t,  $J = 4.0$  Hz, 1H), 6.65 (dd,  $J = 8.2, 2.5$  Hz, 1H), 6.44–6.31 (m, 2H), 3.82 (s, 3H), 2.25 (s, 3H). NMR data are in agreement with those from the literature.<sup>3</sup>

***N*-(4-Methoxyphenyl)-1-phenylethan-1-imine (3o)**

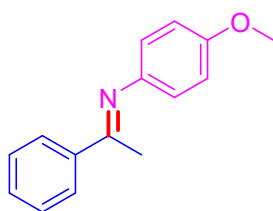

Yellow solid (105.9 mg, 94% yield).  $^1\text{H}$  NMR (500 MHz,  $\text{CDCl}_3$ ):  $\delta$  8.00–7.93 (m, 2H), 7.48–7.41 (m, 3H), 6.95–6.88 (m, 2H), 6.79–6.73 (m, 2H), 3.82 (s, 3H), 2.25 (s, 3H). NMR data are in agreement with those from the literature.<sup>3</sup>

***N*-(3-Methoxyphenyl)-1-phenylethan-1-imine (3p)**

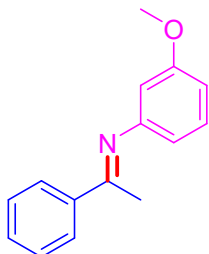

Yellow oil (101.4 mg, 90% yield).  $^1\text{H}$  NMR (500 MHz,  $\text{CDCl}_3$ ):  $\delta$  8.01 (dd,  $J = 7.6, 2.1$  Hz, 2H), 7.50–7.43 (m, 3H), 7.23–7.15 (m, 2H), 7.05–6.90 (m, 1H), 6.65 (d,  $J = 7.7$  Hz, 1H), 2.17 (s, 3H), 2.10 (s, 3H). NMR data are in agreement with those from the literature.<sup>4</sup>

***N*-(4-Hydroxyphenyl)-1-phenylethan-1-imine (3q)**



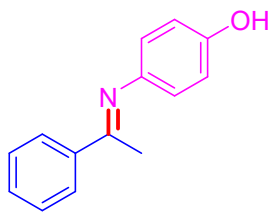

Yellow solid (94.0 mg, 89% yield).  $^1\text{H}$  NMR (500 MHz,  $\text{CDCl}_3$ ):  $\delta$  7.97–7.90 (m, 2H), 7.46–7.42 (m, 3H), 6.84–6.78 (m, 2H), 6.72–6.67 (m, 2H), 2.62 (s, 1H), 2.25 (s, 3H). NMR data are in agreement with those from the literature.<sup>5</sup>

***N*-(4-Fluorophenyl)-1-phenylethan-1-imine (3r)**

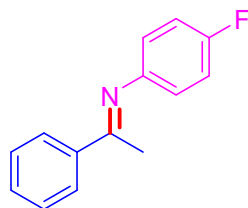

Yellow solid (87.4 mg, 82% yield).  $^1\text{H}$  NMR (500 MHz,  $\text{CDCl}_3$ ):  $\delta$  8.00–7.91 (m, 2H), 7.52–7.40 (m, 3H), 7.05 (t,  $J$  = 8.7 Hz, 2H), 6.80–6.70 (m, 2H), 2.24 (s, 3H). NMR data are in agreement with those from the literature.<sup>1</sup>

***N*-(4-Chlorophenyl)-1-phenylethan-1-imine (3s)**

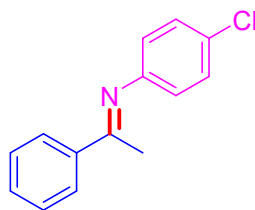

Yellow solid (97.6 mg, 85% yield).  $^1\text{H}$  NMR (500 MHz,  $\text{CDCl}_3$ ):  $\delta$  7.98–7.94 (m, 2H), 7.49–7.43 (m, 3H), 7.32 (d,  $J$  = 8.6 Hz, 2H), 6.76–6.71 (m, 2H), 2.23 (s, 3H). NMR data are in agreement with those from the literature.<sup>1</sup>

***N*-(4-Bromophenyl)-1-phenylethan-1-imine (3t)**

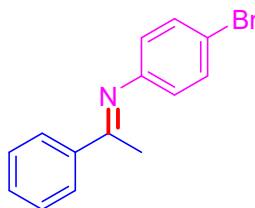

Yellow solid (111.0 mg, 81% yield).  $^1\text{H}$  NMR (500 MHz,  $\text{CDCl}_3$ ):  $\delta$  8.00–7.91 (m, 2H), 7.50–7.42 (m, 5H), 6.72–6.65 (m, 2H), 2.23 (s, 3H). NMR data are in agreement

with those from the literature.<sup>6</sup>

***N*-[3-Acetylphenyl]-1-phenylethan-1-imine (3u)**

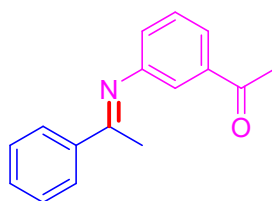

Yellow solid (99.7 mg, 84% yield). <sup>1</sup>H NMR (500 MHz, CDCl<sub>3</sub>): δ 8.02–7.93 (m, 2H), 7.80–7.65 (m, 1H), 7.50–7.42 (m, 4H), 7.40 (t, *J* = 1.9 Hz, 1H), 7.05–6.98 (m, 1H), 2.61 (s, 3H), 2.24 (s, 3H). NMR data are in agreement with those from the literature.<sup>7</sup>

***N*-[3-(Methoxycarbonyl)phenyl]-1-phenylethan-1-imine (3v)**

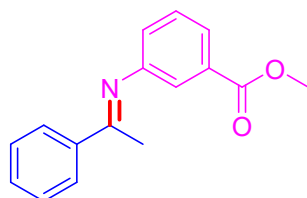

Yellow solid (103.9 mg, 82% yield). <sup>1</sup>H NMR (500 MHz, CDCl<sub>3</sub>): δ 8.01–7.93 (m, 2H), 7.99–7.95 (m, 1H), 7.56–7.37 (m, 5H), 7.03–6.98 (m, 1H), 3.92 (s, 3H), 2.23 (s, 3H). NMR data are in agreement with those from the literature.<sup>7</sup>

***N*-[4-(Trifluoromethyl)phenyl]-1-phenylethan-1-imine (3w)**

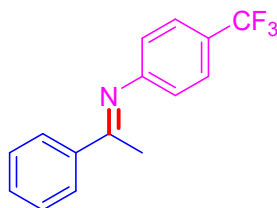

Yellow solid (105.3 mg, 80% yield). <sup>1</sup>H NMR (500 MHz, CDCl<sub>3</sub>): δ 8.02–7.93 (m, 2H), 7.60 (d, *J* = 8.2 Hz, 2H), 7.54–7.42 (m, 3H), 6.91–6.84 (m, 2H), 2.23 (s, 3H). NMR data are in agreement with those from the literature.<sup>7</sup>

***N*-(Naphthalen-2-yl)-1-phenylethan-1-imine (3x)**

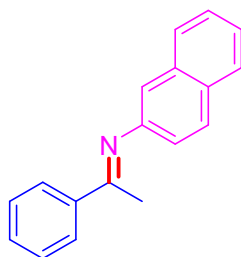

Yellow solid (106.7 mg, 87% yield).  $^1\text{H}$  NMR (500 MHz,  $\text{CDCl}_3$ ):  $\delta$  8.03–7.98 (m, 2H), 7.83 (t,  $J = 8.5$  Hz, 2H), 7.77 (d,  $J = 8.2$  Hz, 1H), 7.50–7.42 (m, 4H), 7.05–7.36 (m, 1H), 7.16 (d,  $J = 2.1$  Hz, 1H), 7.06–7.01 (m, 1H), 2.27 (s, 3H). NMR data are in agreement with those from the literature.<sup>8</sup>

#### ***N*-(1-Phenylethyl)aniline (4a)**

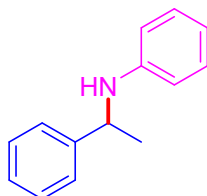

Colorless oil (88.8 mg, 90% yield).  $^1\text{H}$  NMR (500 MHz,  $\text{CDCl}_3$ ):  $\delta$  7.36 (d,  $J = 7.1$  Hz, 2H), 7.31 (t,  $J = 7.6$  Hz, 2H), 7.25–7.19 (m, 1H), 7.08 (dd,  $J = 8.6, 7.3$  Hz, 2H), 6.64 (t,  $J = 7.3$  Hz, 1H), 6.53–6.47 (m, 2H), 4.47 (q,  $J = 6.7$  Hz, 1H), 4.03 (s, 1H), 1.50 (d,  $J = 6.8$  Hz, 3H). NMR data are in agreement with those from the literature.<sup>9</sup>

#### ***N*-(1-(4-Fluorophenyl)ethyl)aniline (4g)**

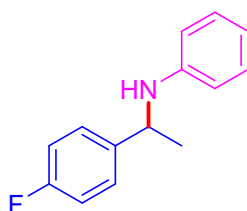

Yellow oil (90.4 mg, 84% yield).  $^1\text{H}$  NMR (500 MHz,  $\text{CDCl}_3$ ):  $\delta$  7.34–7.30 (m, 2H), 7.11–7.06 (m, 2H), 7.02–6.96 (m, 2H), 6.68–6.63 (m, 1H), 6.50–6.47 (m, 2H), 4.46 (d,  $J = 6.7$  Hz, 1H), 4.02 (s, 1H), 1.49 (d,  $J = 6.7$  Hz, 3H). NMR data are in agreement with those from the literature.<sup>10</sup>

#### ***N*-(1-(4-Chlorophenyl)ethyl)aniline (4h)**

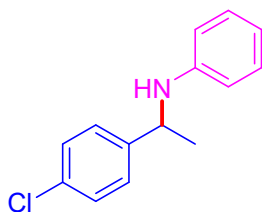

Colorless oil (93.8 mg, 81% yield).  $^1\text{H NMR}$  (500 MHz,  $\text{CDCl}_3$ ):  $\delta$  7.33–7.25 (m, 4H), 7.09 (t,  $J = 7.8$  Hz, 2H), 6.66 (t,  $J = 7.3$  Hz, 1H), 6.47 (d,  $J = 8.0$  Hz, 2H), 4.45 (q,  $J = 6.7$  Hz, 1H), 4.04 (s, 1H), 1.49 (d,  $J = 6.7$  Hz, 3H). NMR data are in agreement with those from the literature.<sup>9</sup>

#### 4-Methyl-*N*-(1-phenylethyl)aniline (4l)

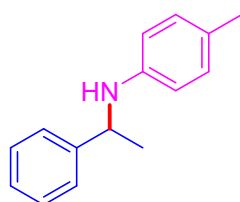

Yellow oil (90.9 mg, 86% yield).  $^1\text{H NMR}$  (500 MHz,  $\text{CDCl}_3$ ):  $\delta$  7.37–7.33 (m, 2H), 7.32–7.27 (m, 2H), 7.23–7.17 (m, 1H), 6.89 (d,  $J = 8.3$  Hz, 2H), 6.42 (d,  $J = 8.4$  Hz, 2H), 4.44 (q,  $J = 6.7$  Hz, 1H), 2.18 (s, 3H), 1.49 (d,  $J = 6.7$  Hz, 3H). NMR data are in agreement with those from the literature.<sup>9</sup>

#### 4-Methoxy-*N*-(1-phenylethyl)aniline (4o)

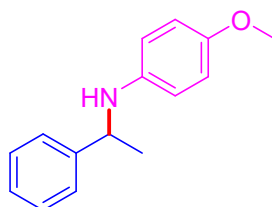

Yellow oil (100.0 mg, 88% yield).  $^1\text{H NMR}$  (500 MHz,  $\text{CDCl}_3$ ):  $\delta$  7.37–7.34 (m, 2H), 7.33–7.28 (m, 2H), 7.25–7.18 (m, 1H), 6.68 (d,  $J = 8.7$  Hz, 2H), 6.47 (d,  $J = 8.8$  Hz, 2H), 4.40 (q,  $J = 6.6$  Hz, 1H), 3.68 (s, 3H), 1.49 (d,  $J = 6.9$  Hz, 3H). NMR data are in agreement with those from the literature.<sup>9</sup>

#### *N*-(1-Phenylethyl)-[4-(trifluoromethyl)phenyl]aniline (4w)

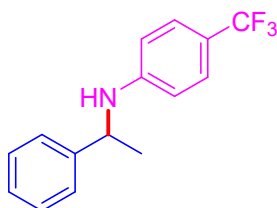

Colorless oil (99.5 mg, 75% yield). <sup>1</sup>H NMR (500 MHz, CDCl<sub>3</sub>): δ 7.37–7.28 (m, 6H), 7.27–7.21 (m, 1H), 6.49 (d, *J* = 8.5 Hz, 2H), 4.50 (q, *J* = 6.7 Hz, 1H), 4.36 (s, 1H), 1.52 (d, *J* = 6.7 Hz, 3H). NMR data are in agreement with those from the literature.<sup>11</sup>

## 6. References

- (1) Zhang, J.; Wang, Y.; Zhang, Y.; Liu, T.; Fang, S.; Wang, R.; Ma, Y.; Fang, R.; Szostak, R.; Szostak, M. Application of Indazolin-3-ylidenes in Catalysis: Steric Tuning of Nonclassical Formally Normal *N*-Heterocyclic Carbenes with Dual Electronic Character for Catalysis. *Organometallics* **2022**, *41*, 1115–1124.
- (2) Hansen, M. C.; Buchwald, S. L. A Method for the Asymmetric Hydrosilylation of *N*-Aryl Imines. *Org. Lett.* **2000**, *2*, 713–715.
- (3) Kathuria, L.; Samuelson, A. G. Ruthenium *N*-Heterocyclic Carbene Complexes for Chemoselective Reduction of Imines and Reductive Amination of Aldehydes and Ketones. *Eur. J. Inorg. Chem.* **2020**, 2372–2379.
- (4) Gutiérrez, R. U.; Hernández-Montes, M.; Mendieta-Moctezuma, A.; Delgado, F.; Tamariz, J. Regioselective Mercury(I)/Palladium(II)-Catalyzed Single-Step Approach for the Synthesis of Imines and 2-Substituted Indoles. *Molecules* **2021**, *26*, 4092–4115.
- (5) Xie, Y.; Chen, X.; Liu, X.; S, S.-J.; L, J.; Zeng, W. Rh(III)-Catalyzed Relay Carbenoid Functionalization of Aromatic C–H Bonds: Access to  $\pi$ -Conjugated Fused Heteroarenes. *Chem. Commun.* **2016**, *52*, 5856–5859.
- (6) Bidusenko, I. A.; Schmidt, E. Y.; Ushakov, I. A.; Trofimov, B. A. *Eur. J. Org. Chem.* **2018**, 4845–4849.
- (7) Virant, M.; Mihelac, M.; Gazvoda, M.; Cotman, A. E.; Frantar, A.; Pinter, B.; Košmrlj, J. Pyridine Wingtip in [Pd(Py-tzNHC)<sub>2</sub>]<sup>2+</sup> Complex Is a Proton Shuttle in the Catalytic Hydroamination of Alkynes. *Org. Lett.* **2020**, *22*, 2157–2161.
- (8) D Ahmed, H. M.; Sharif, H. M. A. Synthesis and Spectral Studies of Acetophenone Schiff Bases and Evaluation of their Antimicrobial Activities. *Asian J. Chem.* **2013**, *25*, 8105–8110.
- (9) Kathuria, L.; Samuelson, A. G. Ruthenium *N*-Heterocyclic Carbene Complexes for Chemoselective Reduction of Imines and Reductive Amination of Aldehydes and Ketones. *Eur. J. Inorg. Chem.* **2020**, 2372–2379.
- (10) Saini, A.; Smith, C. R.; Wekesa, F. S.; Helms, A. K.; Findlater, M. Conversion of

Aldimines to Secondary Amines Using Iron-Catalysed Hydrosilylation. *Org. Biomol. Chem.* **2018**, *16*, 9368–9372.

(11) Grayson, J. D.; Dennis, F. M.; Robertson, C. C.; Partridge, B. M. Chan–Lam Amination of Secondary and Tertiary Benzylic Boronic Esters. *J. Org. Chem.* **2021**, *86*, 9883–9897.

## 7. Copies of $^1\text{H}$ Spectra of Products

$^1\text{H}$  NMR, 500 MHz,  $\text{CDCl}_3$

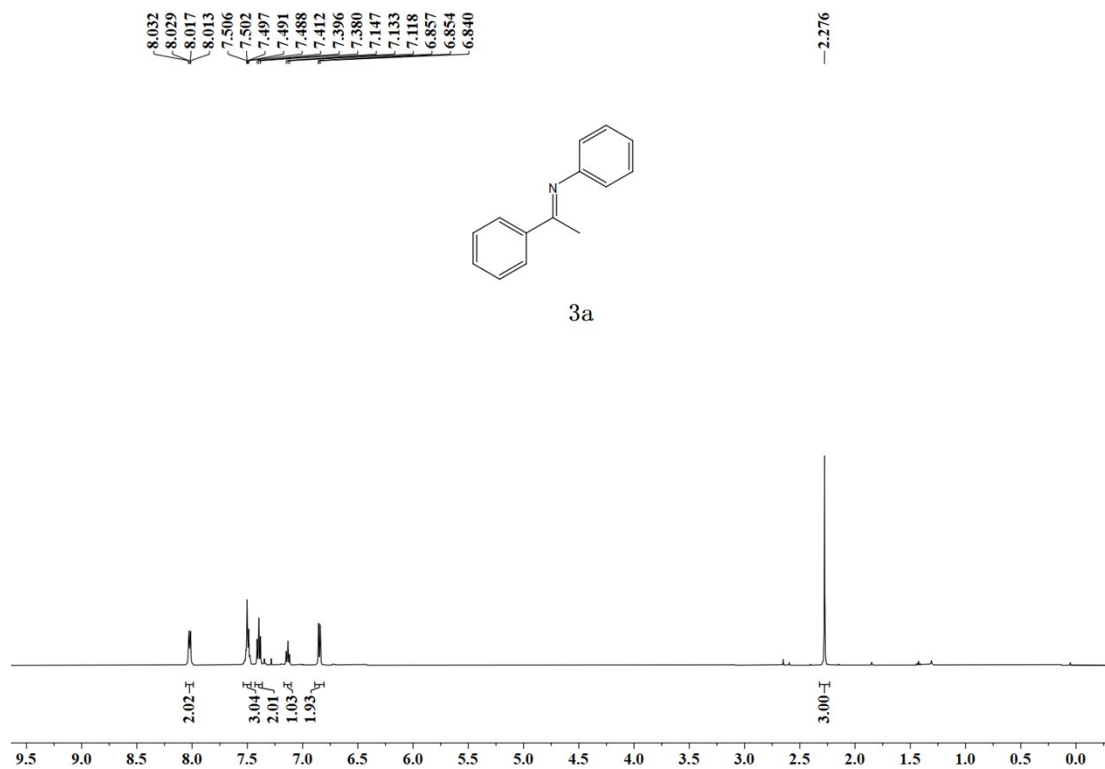

$^1\text{H}$  NMR, 500 MHz,  $\text{CDCl}_3$

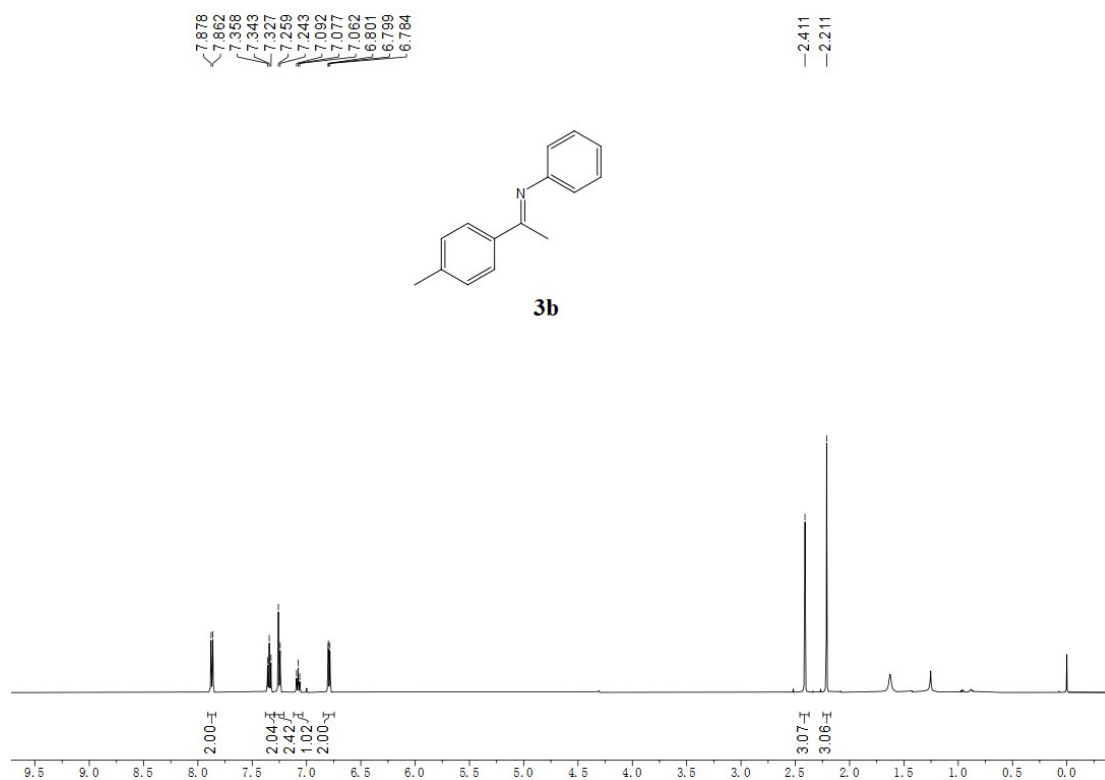

$^1\text{H NMR}$ , 500 MHz,  $\text{CDCl}_3$

7.829  
7.825  
7.821  
7.737  
7.733  
7.724  
7.721  
7.718  
7.364  
7.361  
7.353  
7.349  
7.348  
7.338  
7.333  
7.323  
7.292  
7.277  
7.102  
7.100  
7.097  
7.087  
7.085  
7.082  
7.072  
7.070  
7.067  
6.805  
6.803  
6.799  
6.792  
6.788  
6.786

-2.423  
-2.222

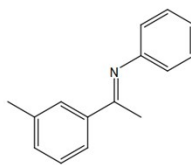

**3c**

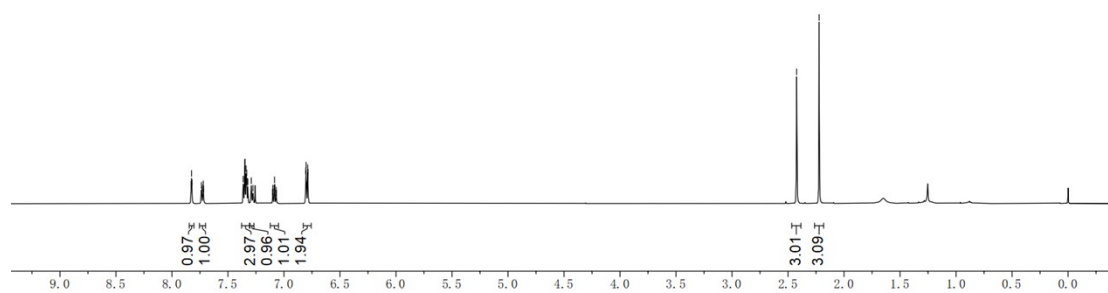

$^1\text{H NMR}$ , 500 MHz,  $\text{CDCl}_3$

7.433  
7.422  
7.419  
7.415  
7.399  
7.384  
7.320  
7.307  
7.303  
7.299  
7.287  
7.283  
7.275  
7.153  
7.150  
7.148  
7.143  
7.138  
7.135  
7.126  
7.118  
7.113  
7.110  
7.099  
7.095  
7.069  
7.065  
7.056  
7.052  
7.048  
7.034  
6.896  
6.893  
6.889  
6.879  
6.877  
6.707  
6.704  
6.690  
6.688

2.539  
2.500  
2.186  
2.137

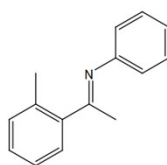

**3d**

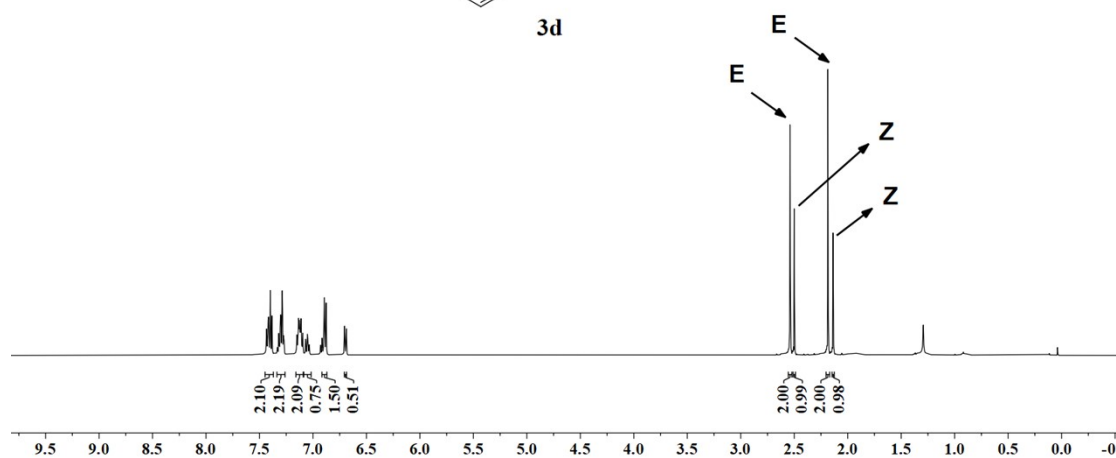



$^1\text{H}$  NMR, 500 MHz,  $\text{CDCl}_3$

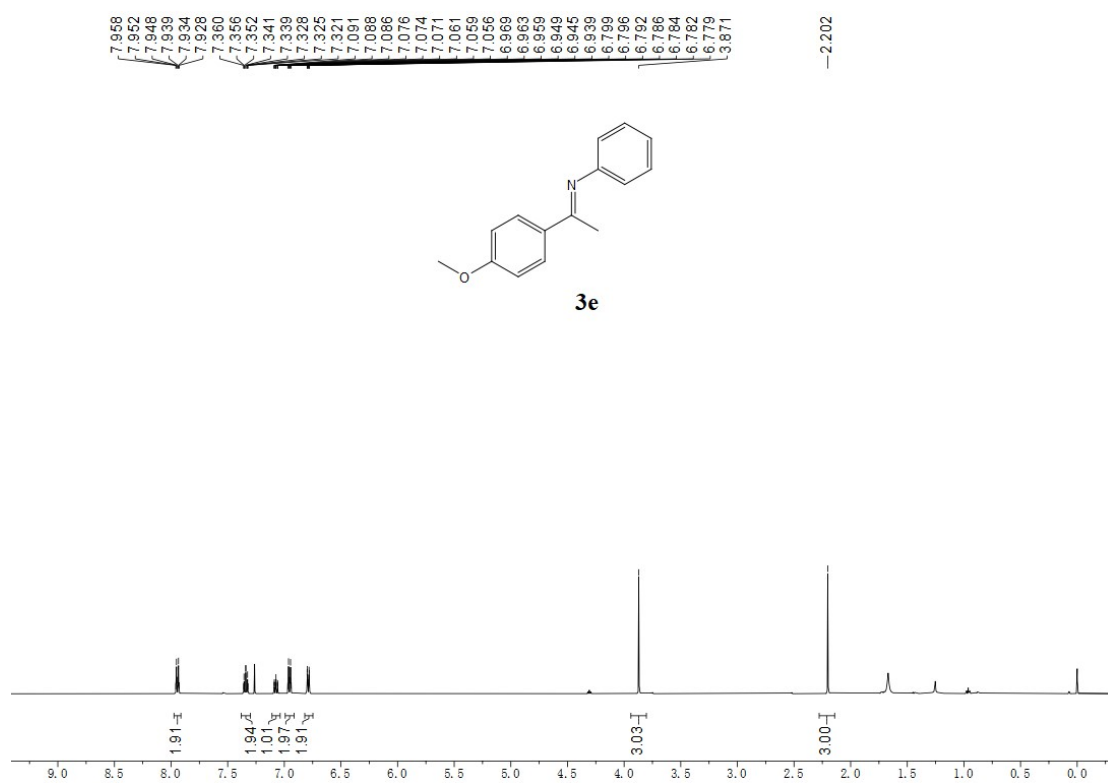

$^1\text{H}$  NMR, 500 MHz,  $\text{CDCl}_3$

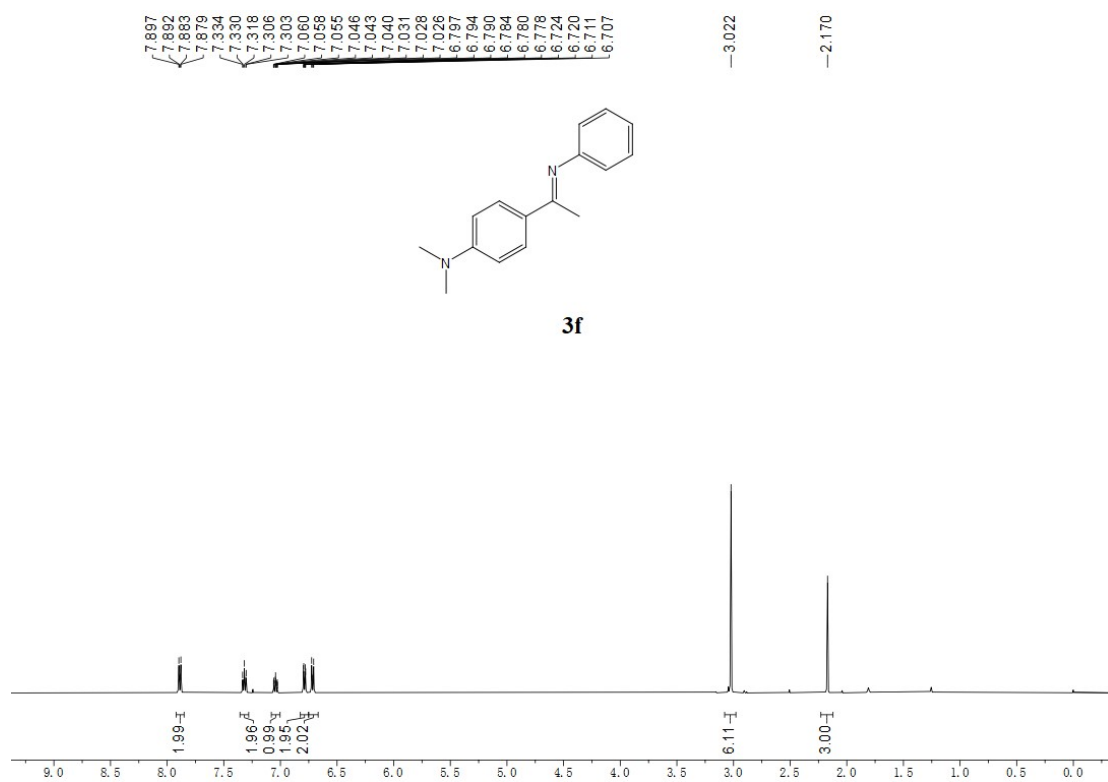

$^1\text{H}$  NMR, 500 MHz,  $\text{CDCl}_3$

7.994  
7.990  
7.983  
7.977  
7.970  
7.966  
7.366  
7.354  
7.341  
7.338  
7.148  
7.141  
7.137  
7.124  
7.111  
7.107  
7.096  
7.094  
7.082  
7.081  
7.079  
7.077  
6.796  
6.793  
6.779  
6.777

-2.219

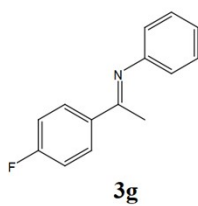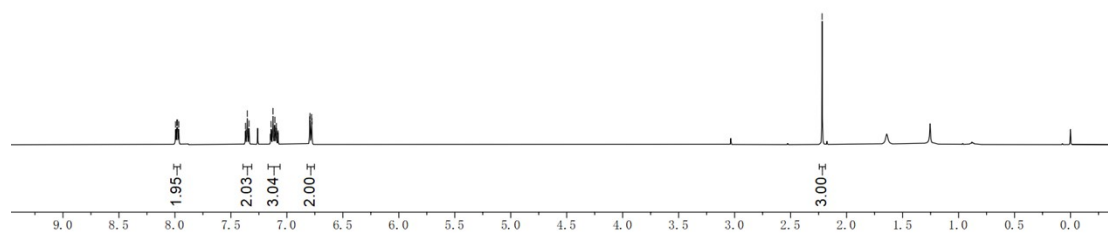

$^1\text{H}$  NMR, 500 MHz,  $\text{CDCl}_3$

7.926  
7.913  
7.909  
7.426  
7.412  
7.409  
7.371  
7.356  
7.341  
7.114  
7.099  
7.084  
6.794  
6.792  
6.777

-2.215

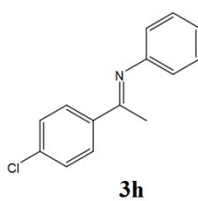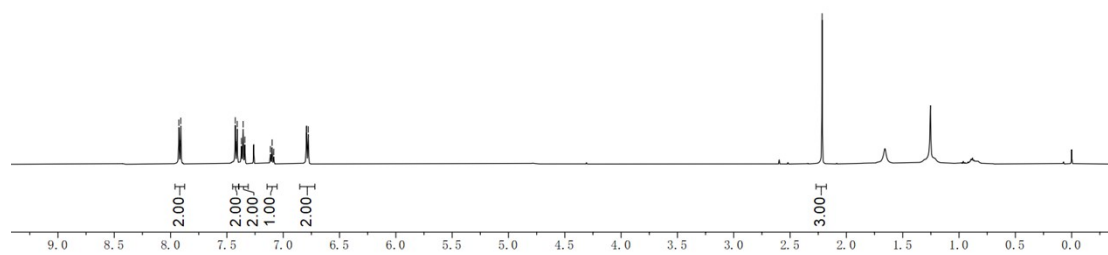

<sup>1</sup>H NMR, 500 MHz, CDCl<sub>3</sub>

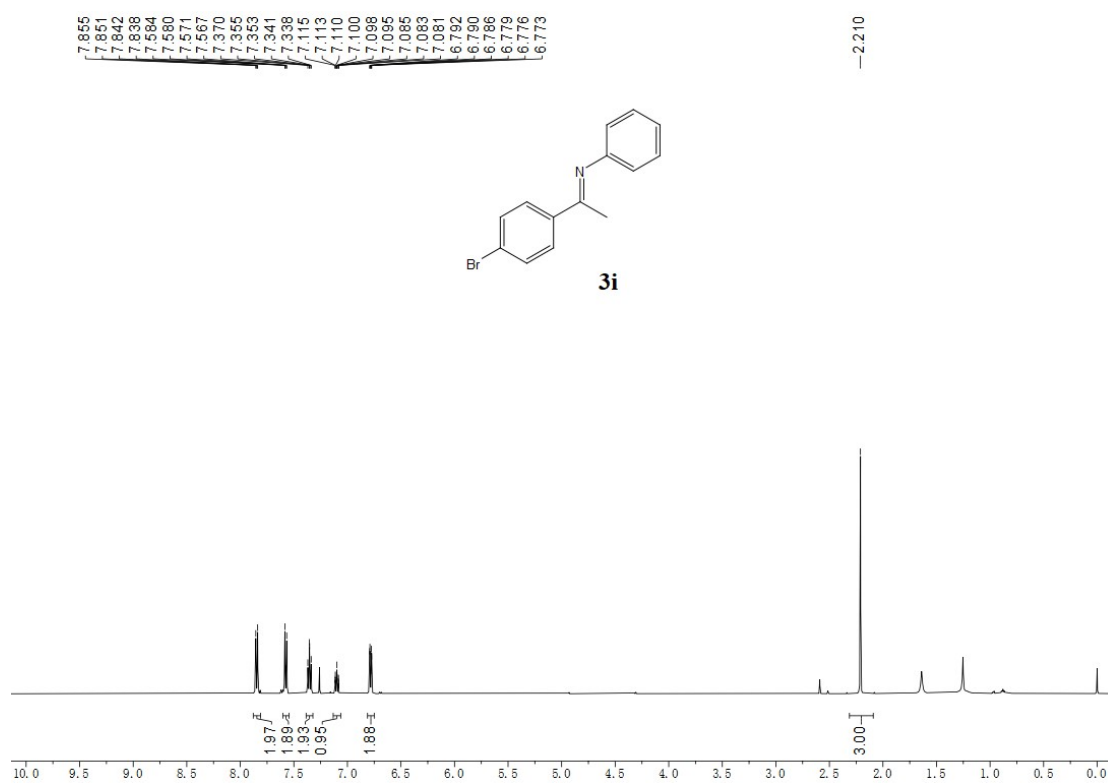

<sup>1</sup>H NMR, 500 MHz, CDCl<sub>3</sub>

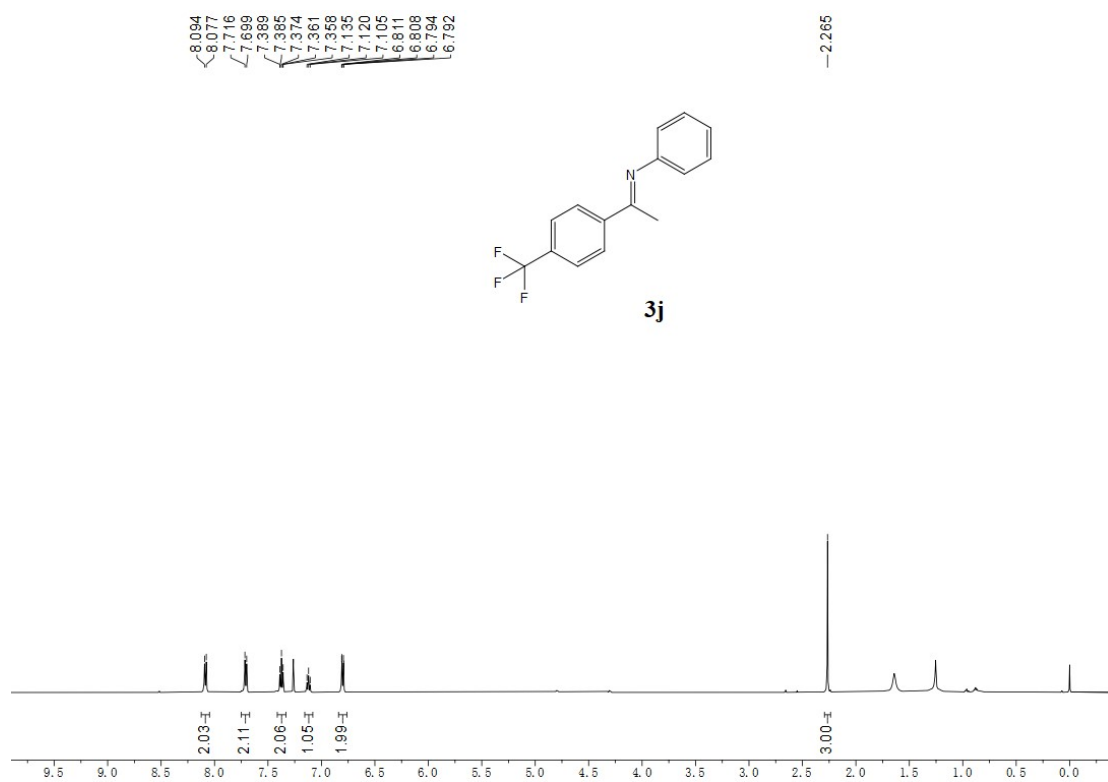

<sup>1</sup>H NMR, 500 MHz, CDCl<sub>3</sub>

8.347  
8.343  
8.233  
8.229  
8.216  
8.212  
7.943  
7.929  
7.825  
7.807  
7.889  
7.883  
7.869  
7.850  
7.546  
7.541  
7.536  
7.531  
7.526  
7.522  
7.392  
7.377  
7.375  
7.360  
7.126  
7.124  
7.122  
7.112  
7.109  
7.107  
7.096  
7.094  
6.856  
6.853  
6.839  
6.836

-2.359

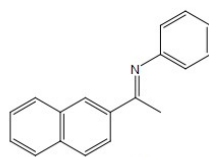

**3k**

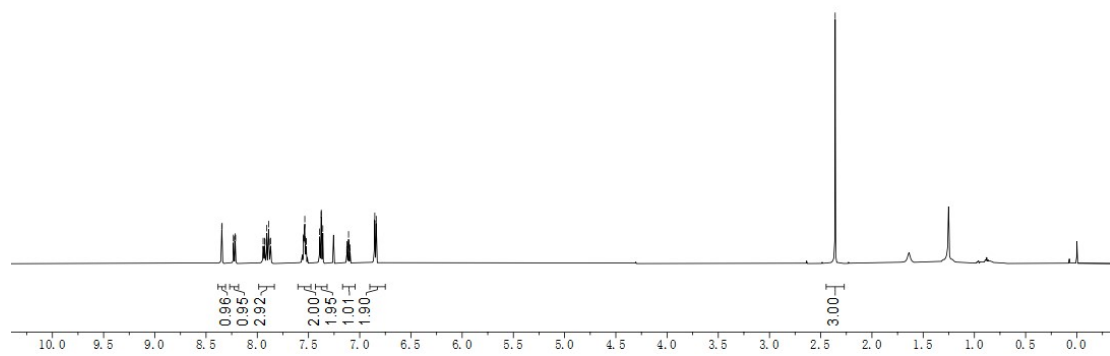

<sup>1</sup>H NMR, 500 MHz, CDCl<sub>3</sub>

7.973  
7.969  
7.866  
7.864  
7.858  
7.853  
7.453  
7.450  
7.446  
7.441  
7.438  
7.165  
7.153  
7.149  
6.713  
6.709  
6.700  
6.696

-2.349  
-2.237

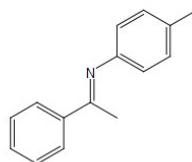

**3l**

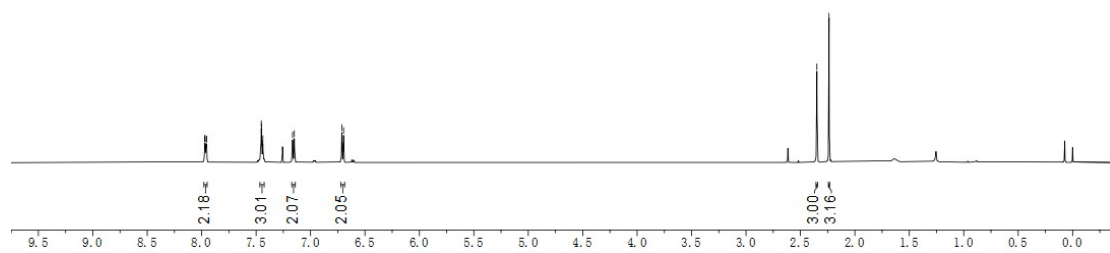

$^1\text{H NMR}$ , 500 MHz,  $\text{CDCl}_3$

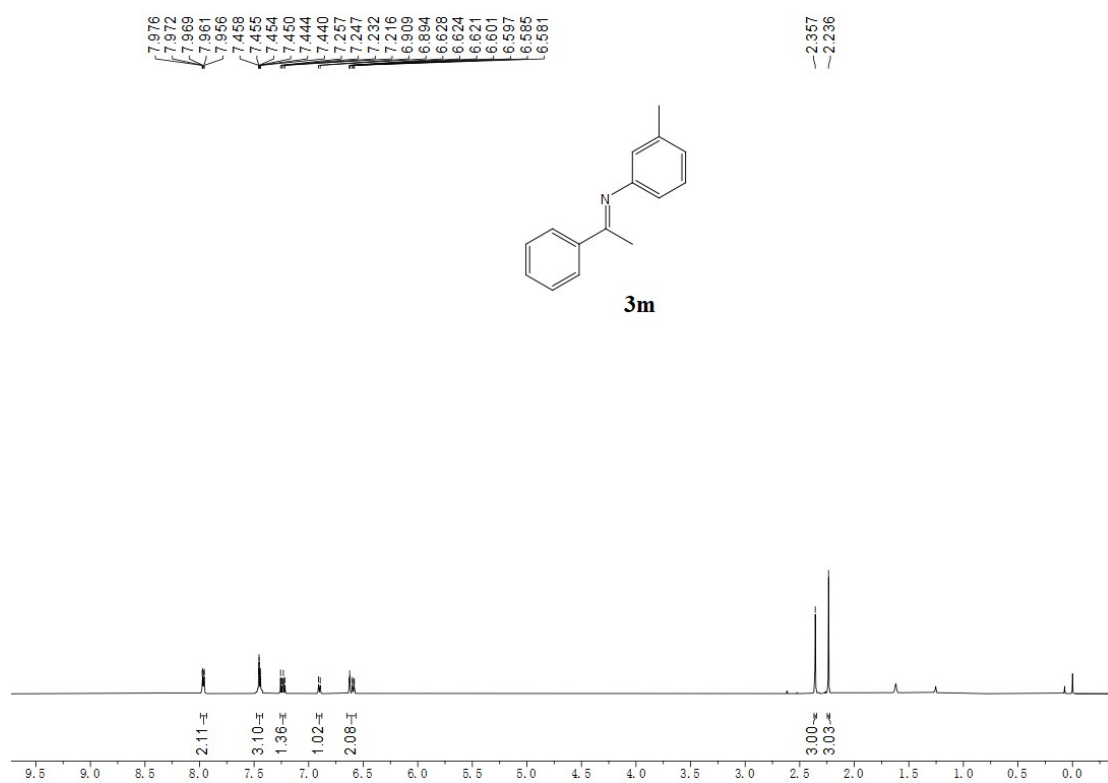

$^1\text{H NMR}$ , 500 MHz,  $\text{CDCl}_3$

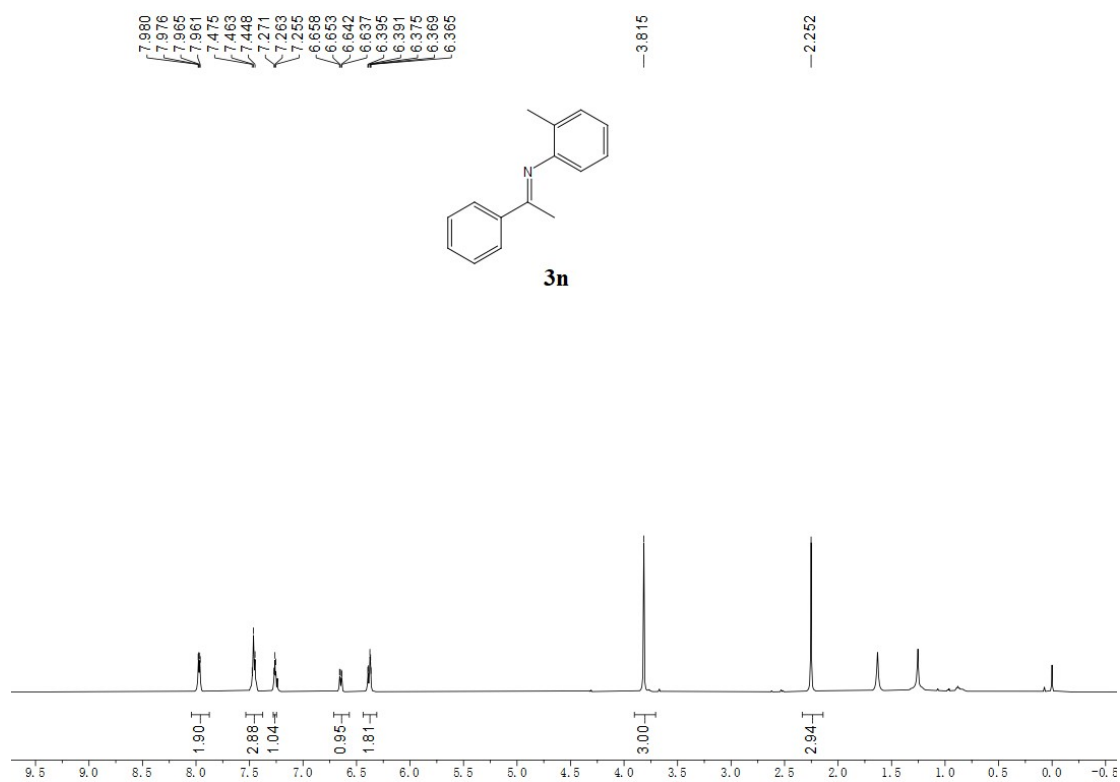

$^1\text{H}$  NMR, 500 MHz,  $\text{CDCl}_3$

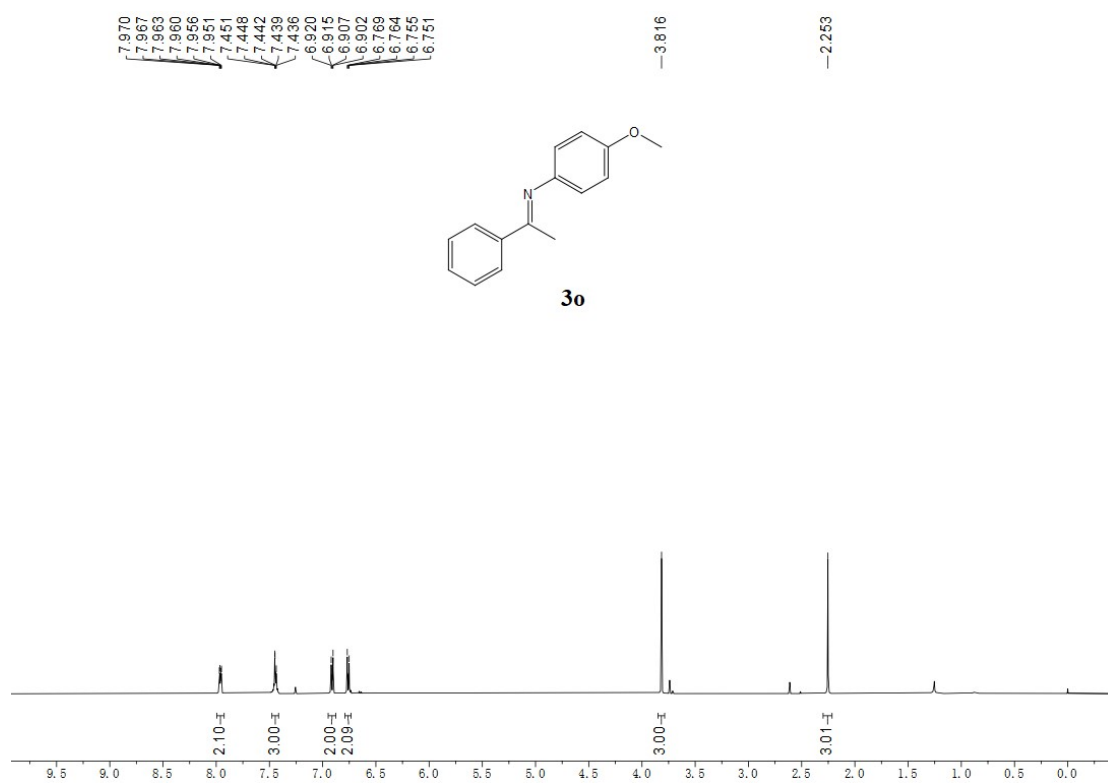

$^1\text{H}$  NMR, 500 MHz,  $\text{CDCl}_3$

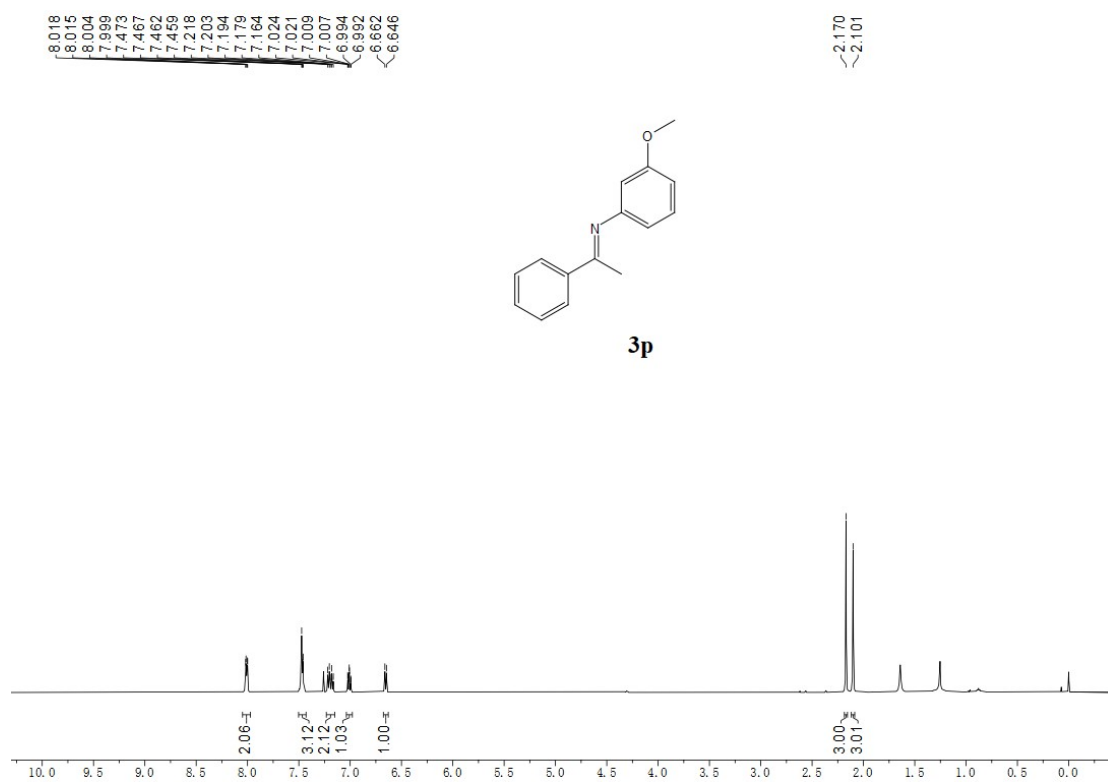

$^1\text{H NMR}$ , 500 MHz,  $\text{CDCl}_3$

7.959  
7.956  
7.952  
7.948  
7.942  
7.937  
7.452  
7.443  
7.437  
7.429  
6.828  
6.824  
6.815  
6.811  
6.702  
6.698  
6.689  
6.685

-2.615  
-2.253

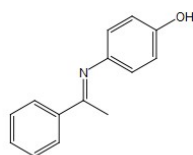

**3q**

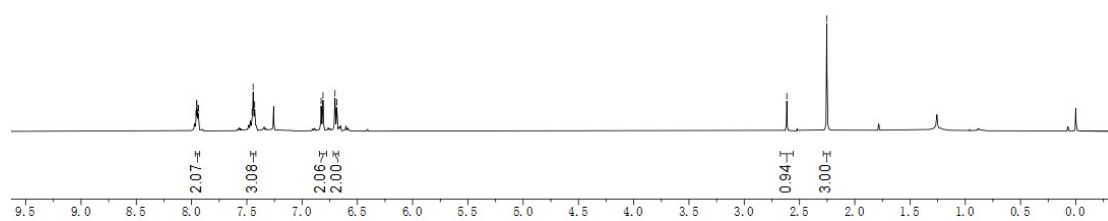

$^1\text{H NMR}$ , 500 MHz,  $\text{CDCl}_3$

7.969  
7.966  
7.962  
7.954  
7.950  
7.467  
7.463  
7.459  
7.447  
7.067  
7.054  
7.049  
7.044  
7.032  
6.767  
6.763  
6.757  
6.754  
6.750  
6.744  
6.740

-2.239

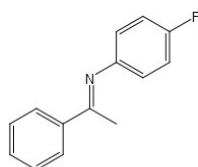

**3r**

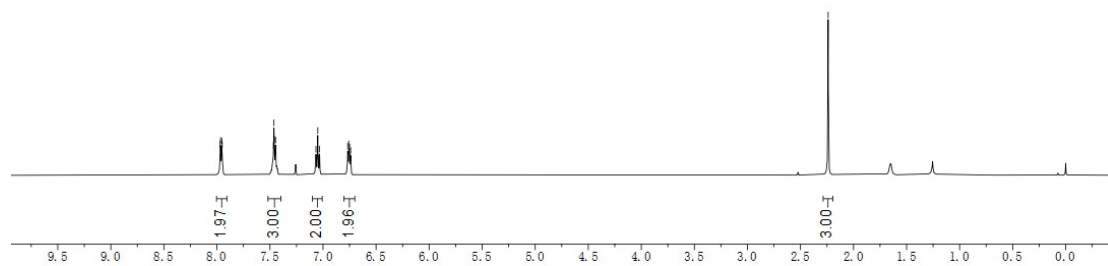

$^1\text{H NMR}$ , 500 MHz,  $\text{CDCl}_3$

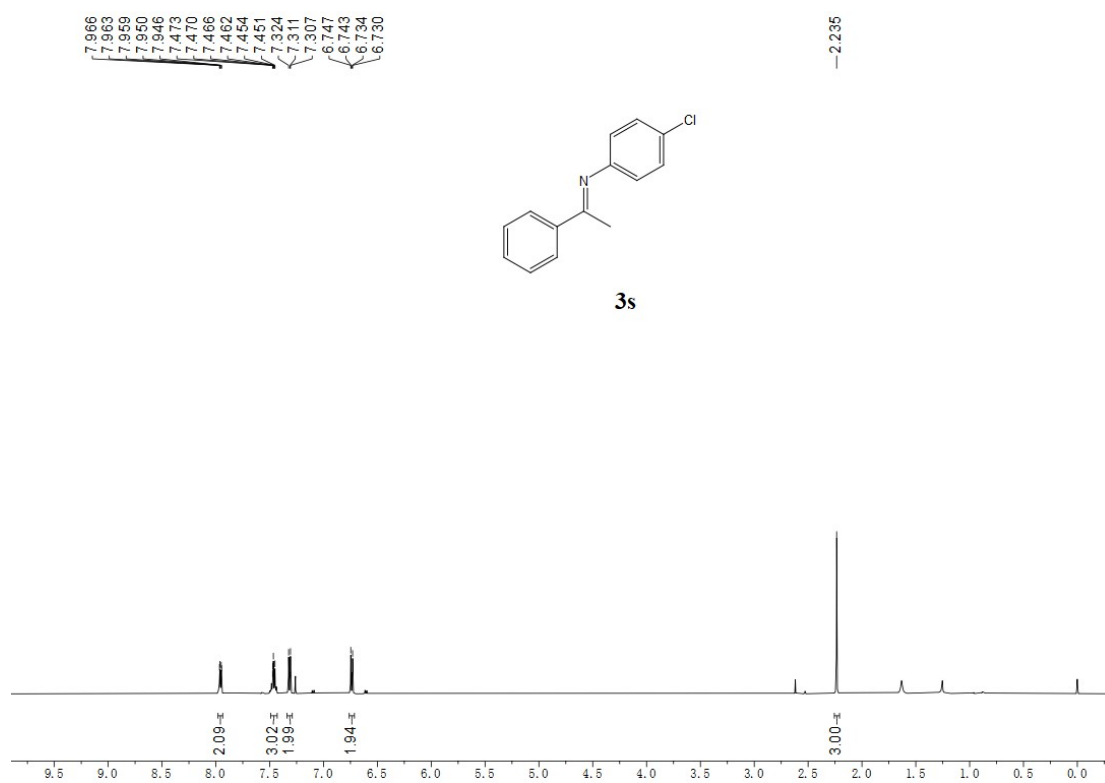

$^1\text{H NMR}$ , 500 MHz,  $\text{CDCl}_3$

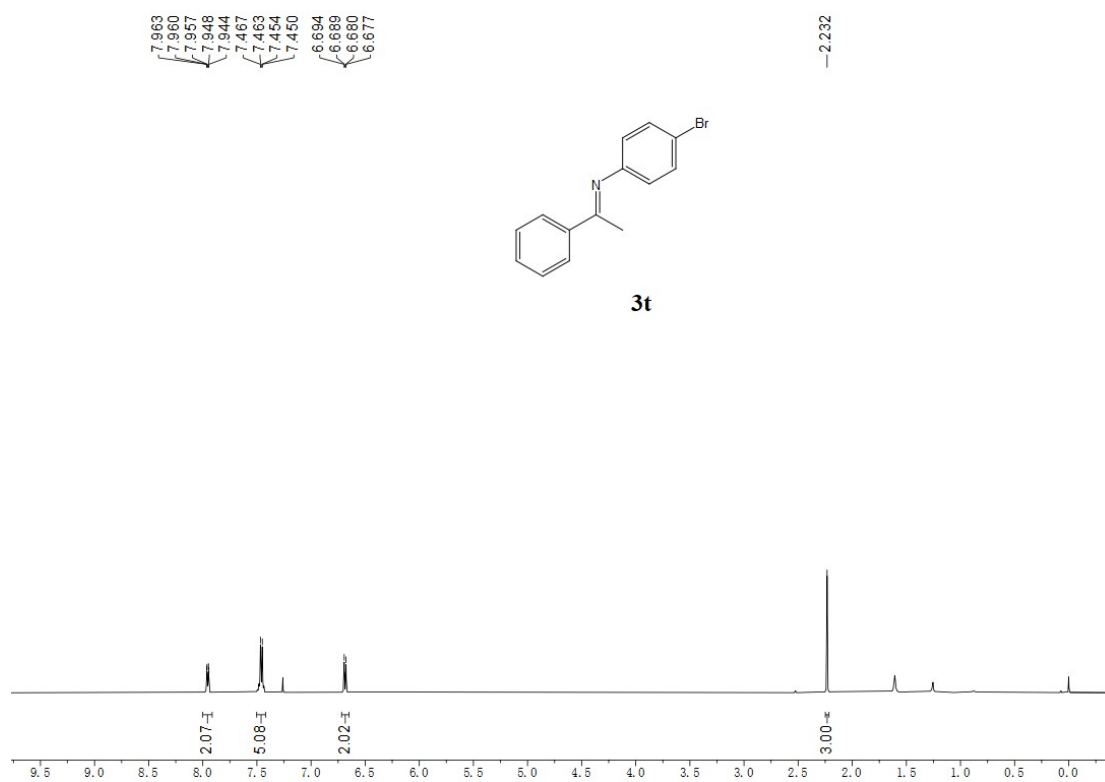



$^1\text{H NMR}$ , 500 MHz,  $\text{CDCl}_3$

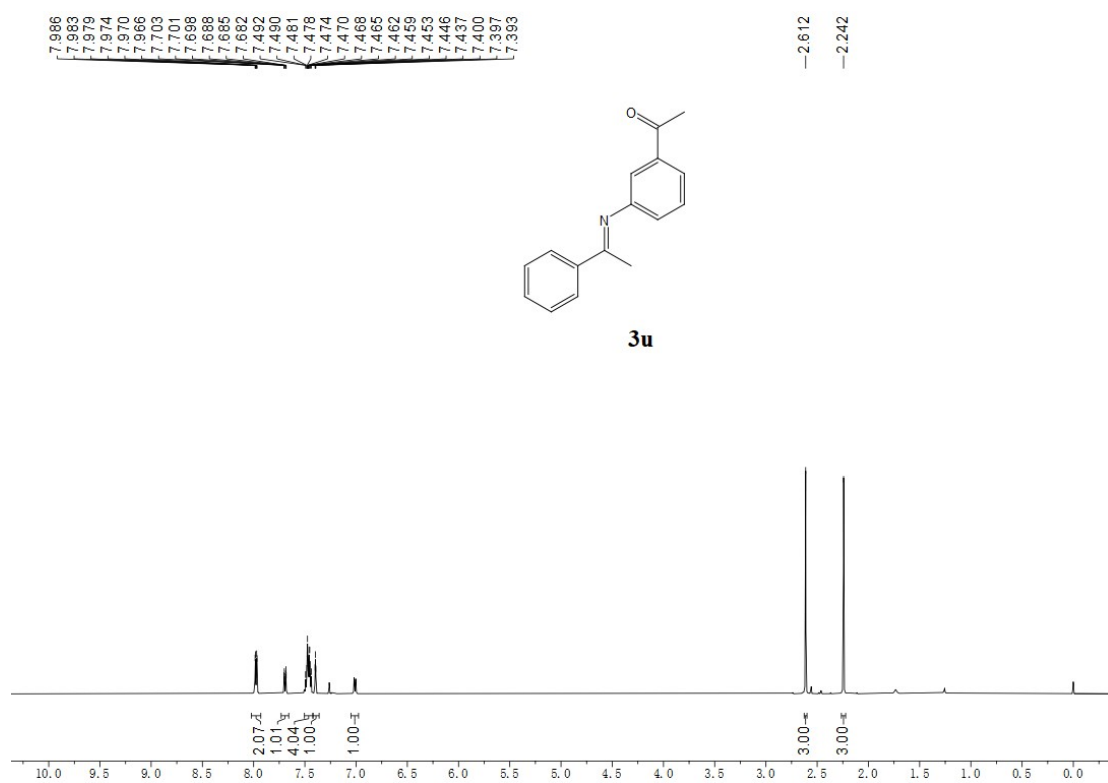

$^1\text{H NMR}$ , 500 MHz,  $\text{CDCl}_3$

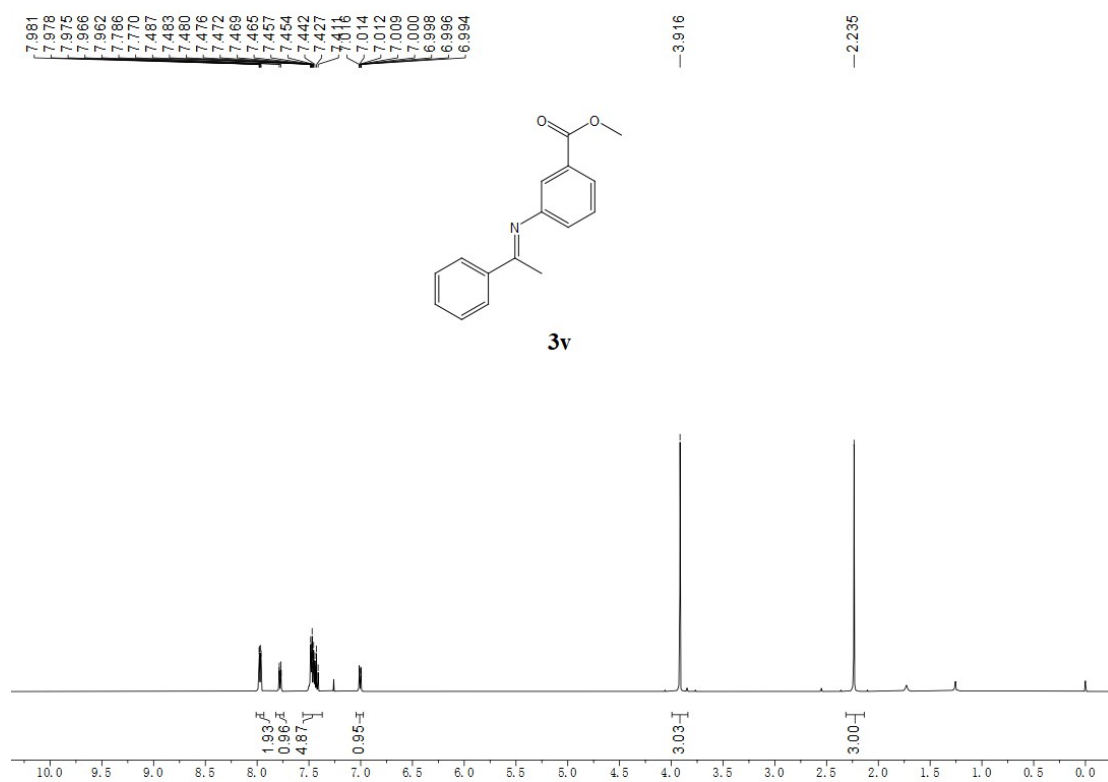

$^1\text{H}$  NMR, 500 MHz,  $\text{CDCl}_3$

7.982  
7.979  
7.976  
7.970  
7.966  
7.963  
7.612  
7.600  
7.596  
7.496  
7.486  
7.483  
7.480  
7.477  
7.475  
7.472  
7.466  
7.464  
7.461  
7.459  
7.447  
6.883  
6.881  
6.870  
6.866

-2.232

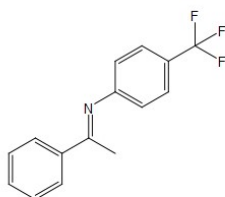

**3w**

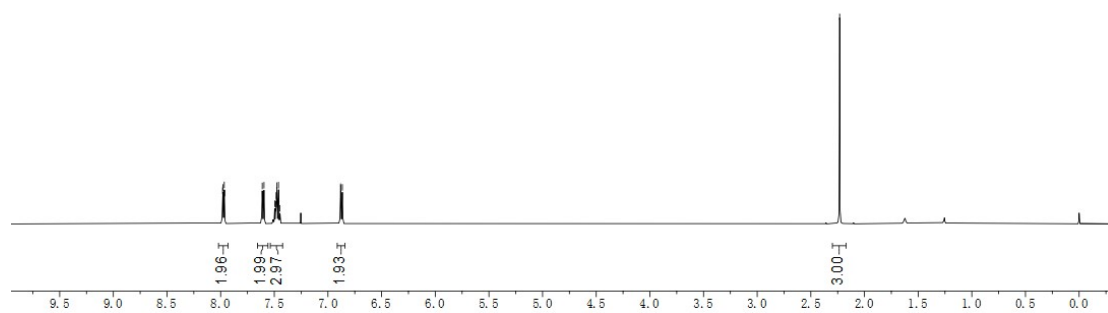

$^1\text{H}$  NMR, 500 MHz,  $\text{CDCl}_3$

8.024  
8.021  
8.017  
8.009  
8.005  
8.002  
7.845  
7.827  
7.811  
7.774  
7.758  
7.476  
7.471  
7.463  
7.456  
7.453  
7.442  
7.439  
7.408  
7.391  
7.405  
7.388  
7.378  
7.375  
7.166  
7.162  
7.049  
7.045  
7.042  
7.032  
7.028  
7.025

-2.269

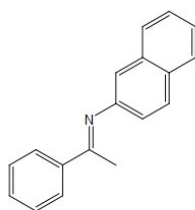

**3x**

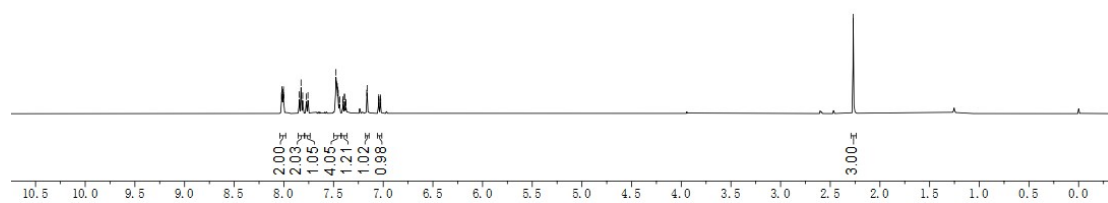

$^1\text{H}$  NMR, 500 MHz,  $\text{CDCl}_3$

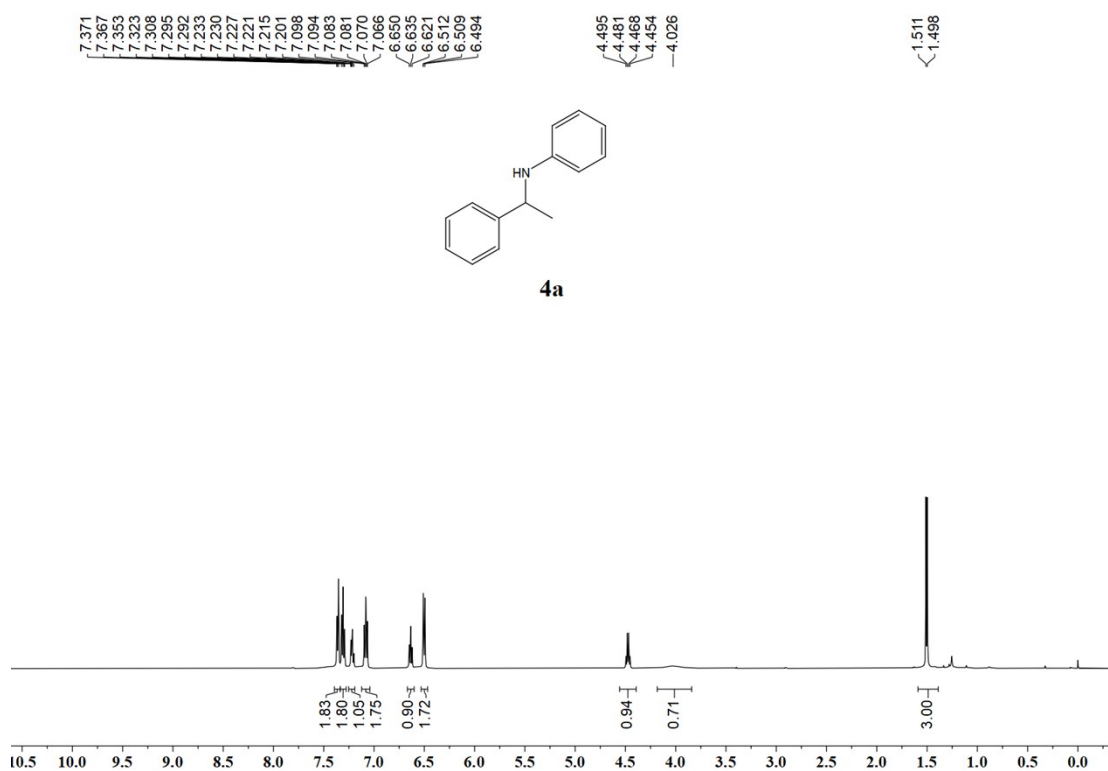

$^1\text{H}$  NMR, 500 MHz,  $\text{CDCl}_3$

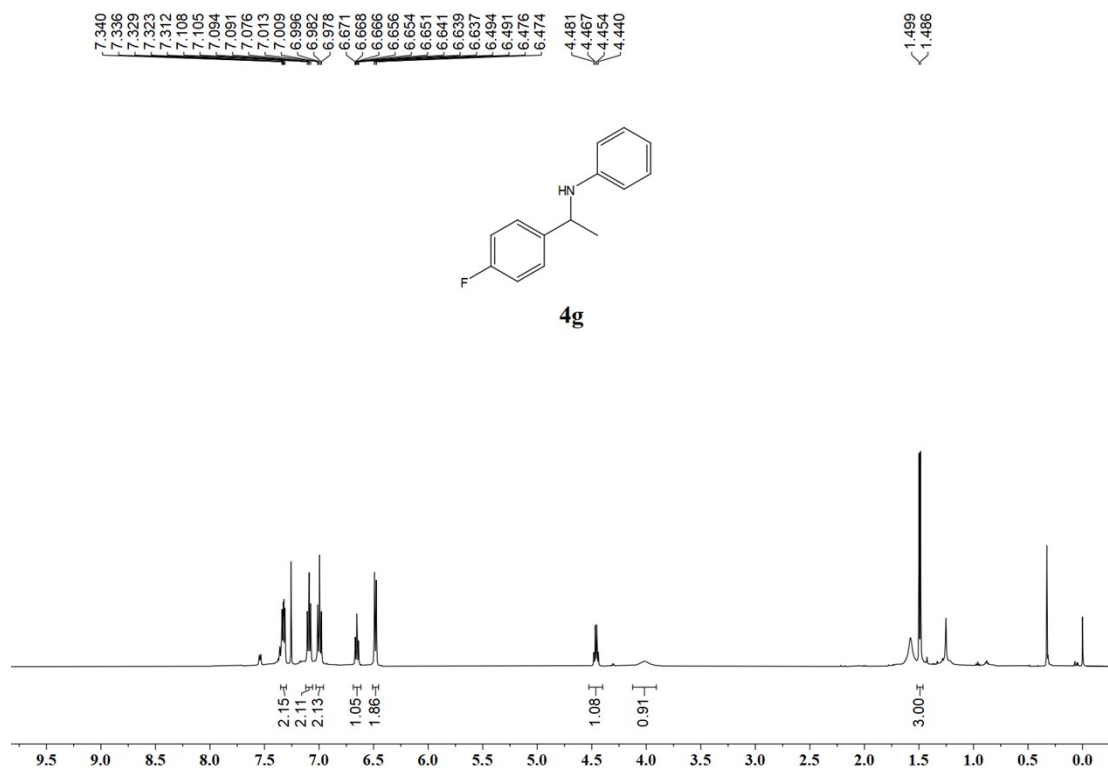

$^1\text{H}$  NMR, 500 MHz,  $\text{CDCl}_3$

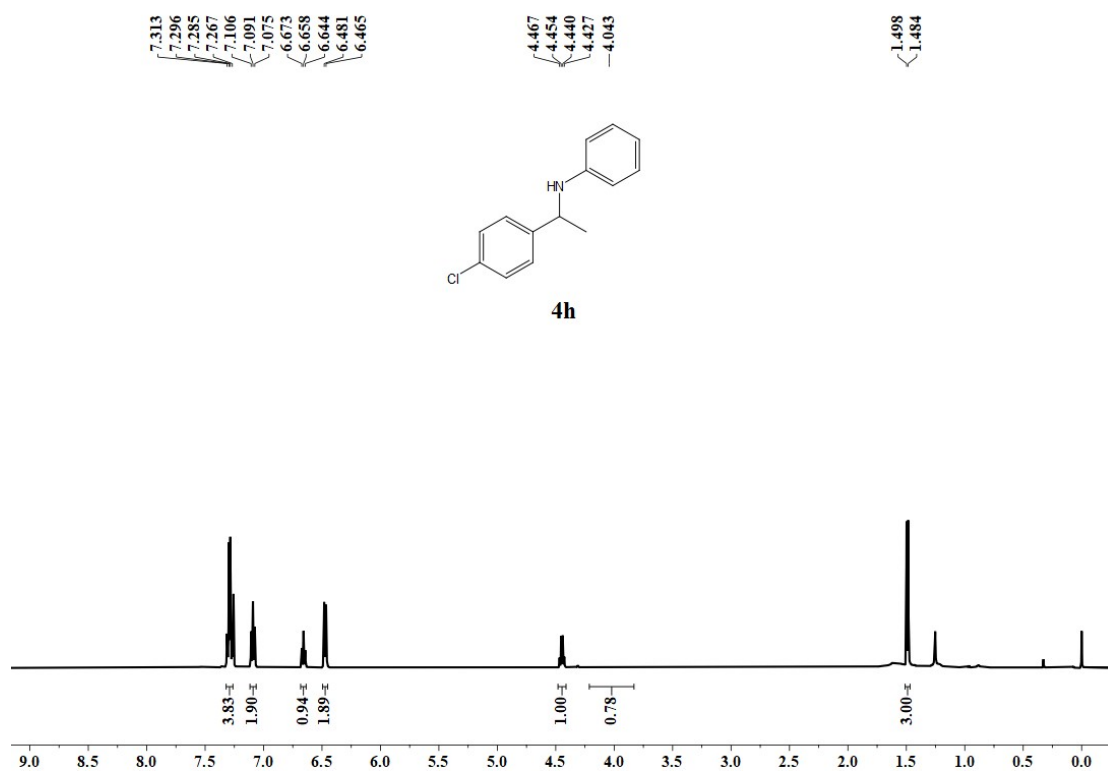

$^1\text{H}$  NMR, 500 MHz,  $\text{CDCl}_3$

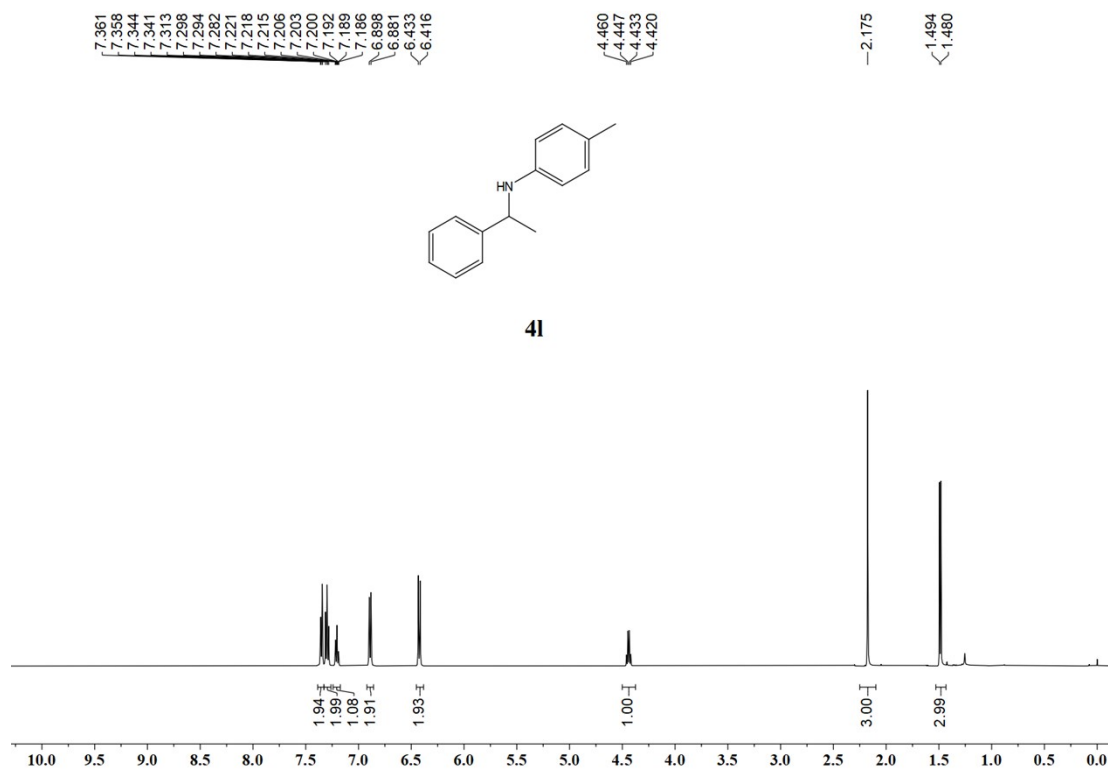

<sup>1</sup>H NMR, 500 MHz, CDCl<sub>3</sub>

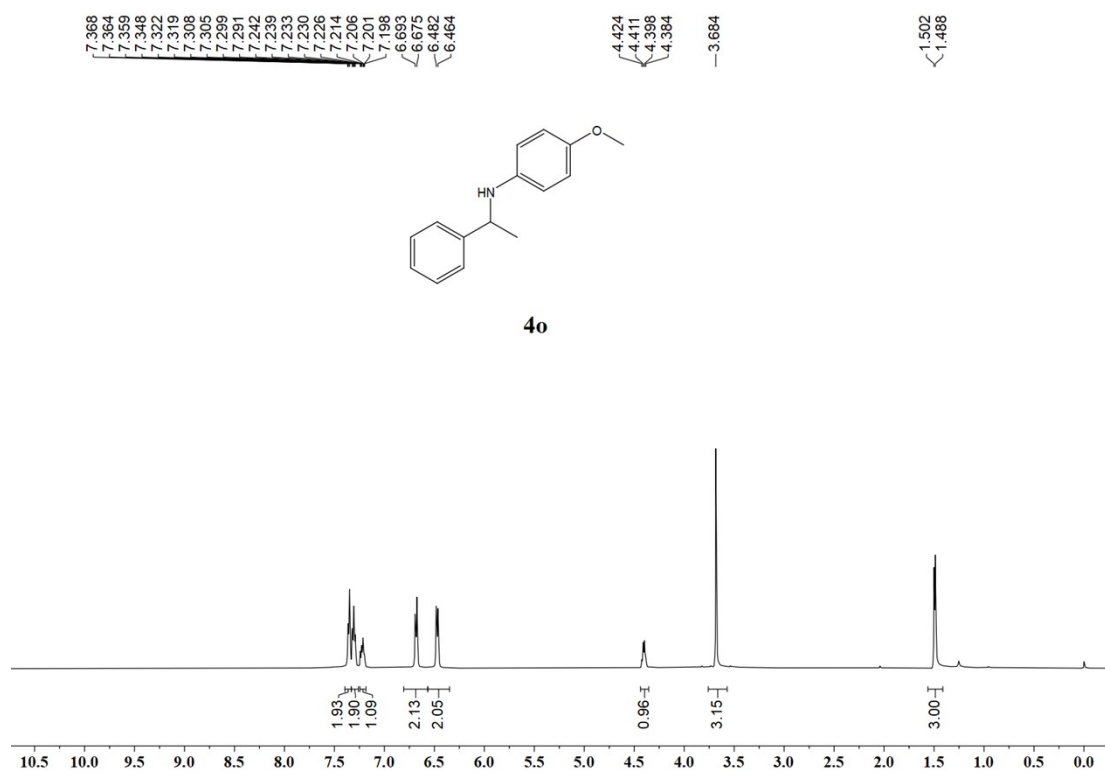

<sup>1</sup>H NMR, 500 MHz, CDCl<sub>3</sub>

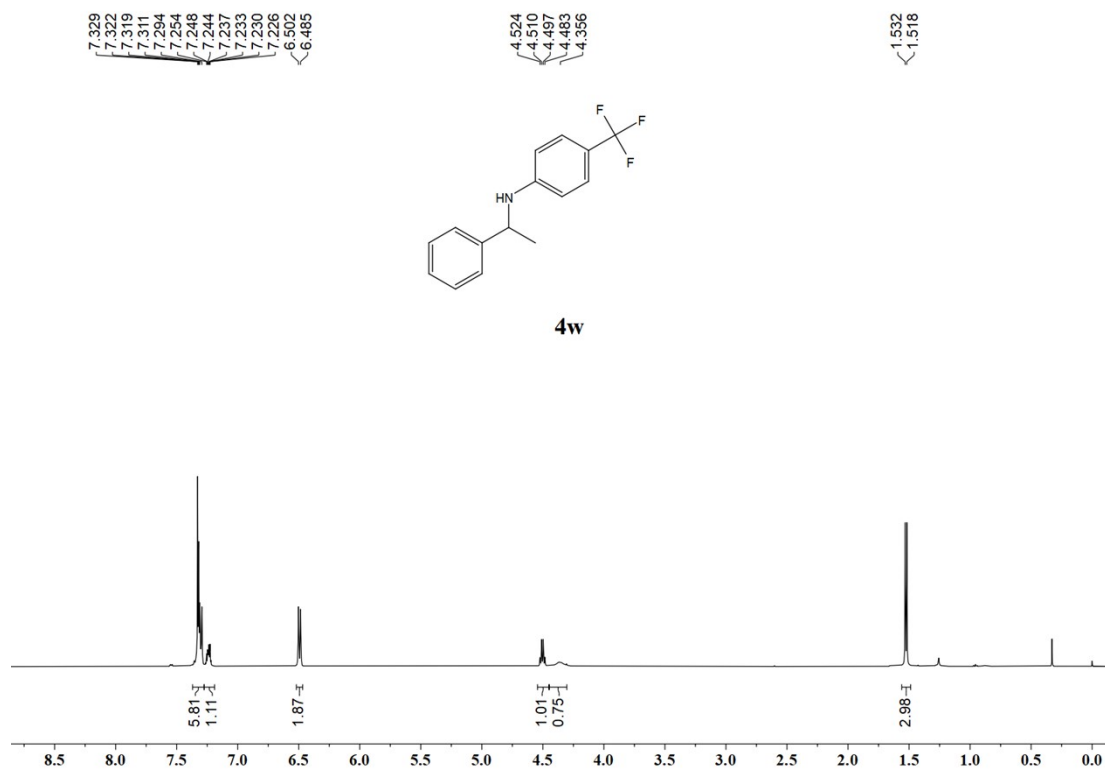

Supplement: d2ra07120g1.pdf [file d2ra07120g1.pdf]
